# Supplementary material for: Cation exchange synthesis of AgBiS2 quantum dots for highly efficient solar cells
Source: Royal Society of Chemistry journal article supplement (doi:10.1039/d3nr06128k), 2024-01-01
Supplement: d3nr06128k1.pdf [file d3nr06128k1.pdf]

## Supporting Information

### Cation exchange synthesis of AgBiS<sub>2</sub> quantum dots for highly efficient solar cells

Alina Senina, Anatol Prudnikau, Angelika Wrzesińska-Lashkova, Yana Vaynzof, Fabian Paulus\*

\*corresponding author: f.paulus@ifw-dresden.de

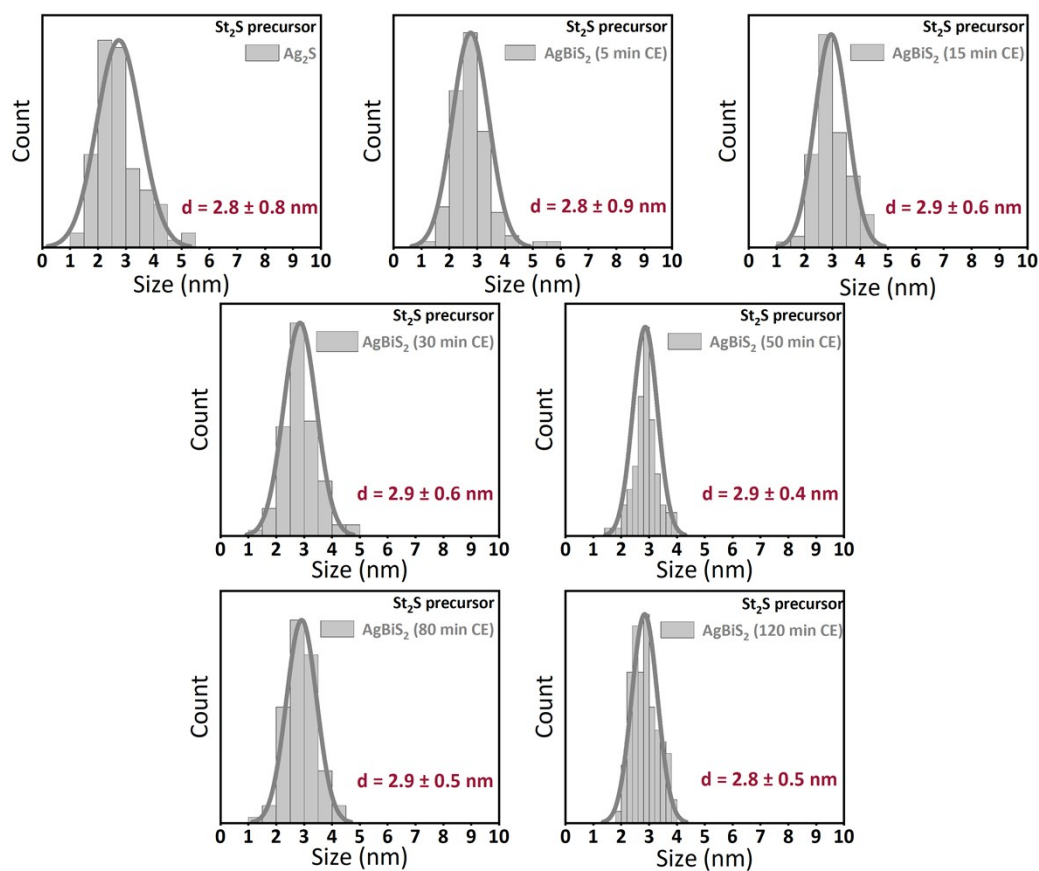

Figure S1. Particle size distribution of AgBiS<sub>2</sub> synthesized with St<sub>2</sub>S at different reaction times of cation exchange.

Table S1. Relative atomic percentages and ratio (XPS) for Ag<sub>2</sub>S and AgBiS<sub>2</sub> at different reaction times.

|                   | <b>Ag, %</b> | <b>Bi, %</b> | <b>S, %</b> | <b>Ag:Bi:S ratio</b> |
|-------------------|--------------|--------------|-------------|----------------------|
| Ag <sub>2</sub> S | 1.14         | -            | 0.55        | 2.1:1                |
| 5 min             | 11.18        | 5.44         | 8.64        | 1.3:0.6:1            |
| 15 min            | 7.59         | 6.54         | 8.88        | 0.9:0.7:1            |
| 30 min            | 5.64         | 4.95         | 6.25        | 0.9:0.8:1            |
| 50 min            | 8.19         | 6.53         | 9.76        | 0.8:0.7:1            |
| 80 min            | 6.9          | 5.61         | 8.41        | 0.8:0.7:1            |
| 120 min           | 9.06         | 7.15         | 12.15       | 0.8:0.6:1            |

Table S2. Atomic ratio (XPS) for AgBiS<sub>2</sub> synthesized with cation exchange and hot-injection methods.

|                                                                    | <b>Ag:Bi:S ratio</b> | <b>reference</b> |
|--------------------------------------------------------------------|----------------------|------------------|
| AgBiS <sub>2</sub> -St <sub>2</sub> S<br>(CE synthesis)            | 0.8:0.6:1            | This work        |
| AgBiS <sub>2</sub> -St <sub>2</sub> S<br>(Hot-injection synthesis) | 1.7:0.3:1            | 1                |
| AgBiS <sub>2</sub> -TMS <sub>2</sub> S (Hot-injection synthesis)   | 1.2:0.7:1            | 1                |
| AgBiS <sub>2</sub> -TMS <sub>2</sub> S (Hot-injection synthesis)   | 1.5:1.0:1.6          | 2                |

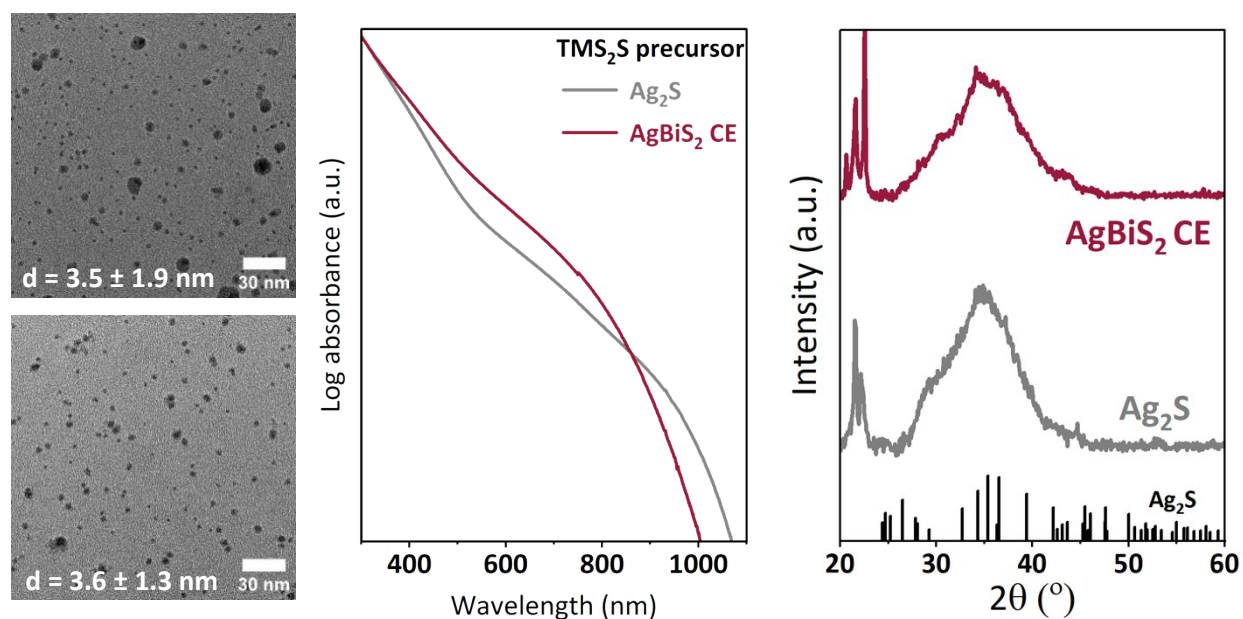

Figure S2. TEM images before exchange (top) and after exchange (bottom), absorbance spectra and XRD patterns of  $\text{Ag}_2\text{S}$  and  $\text{AgBiS}_2$  synthesized with  $\text{TMS}_2\text{S}$  precursor.

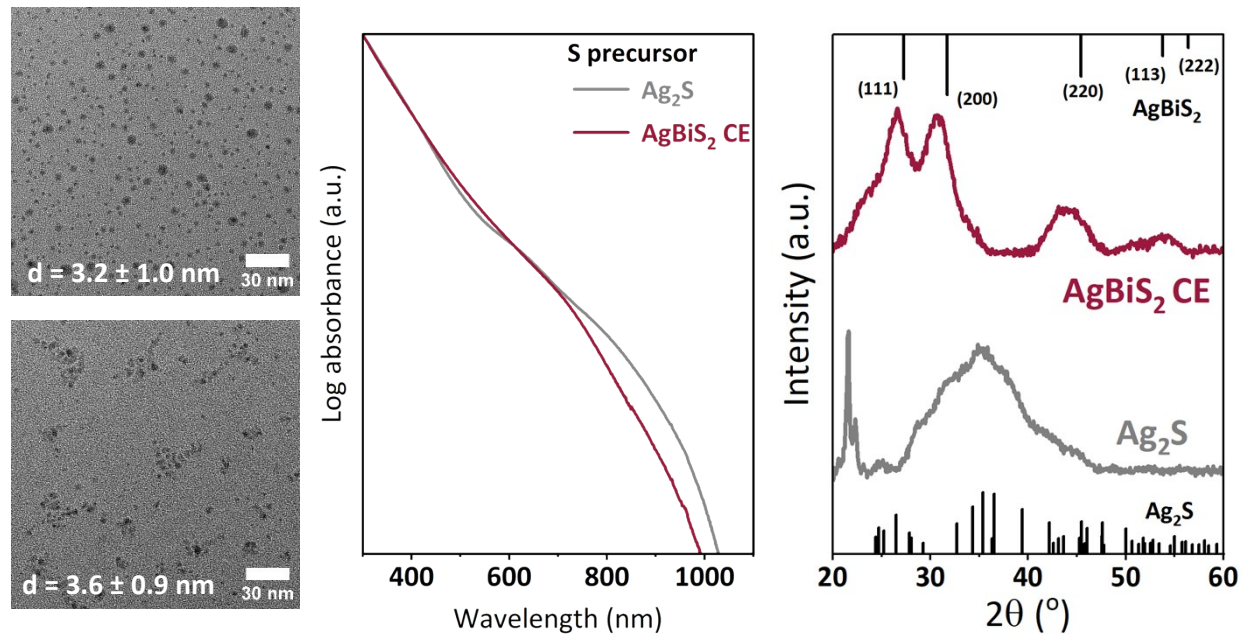

Figure S3. TEM images before exchange (top) and after exchange (bottom), absorbance spectra and XRD patterns of  $\text{Ag}_2\text{S}$  and  $\text{AgBiS}_2$  synthesized with S precursor.

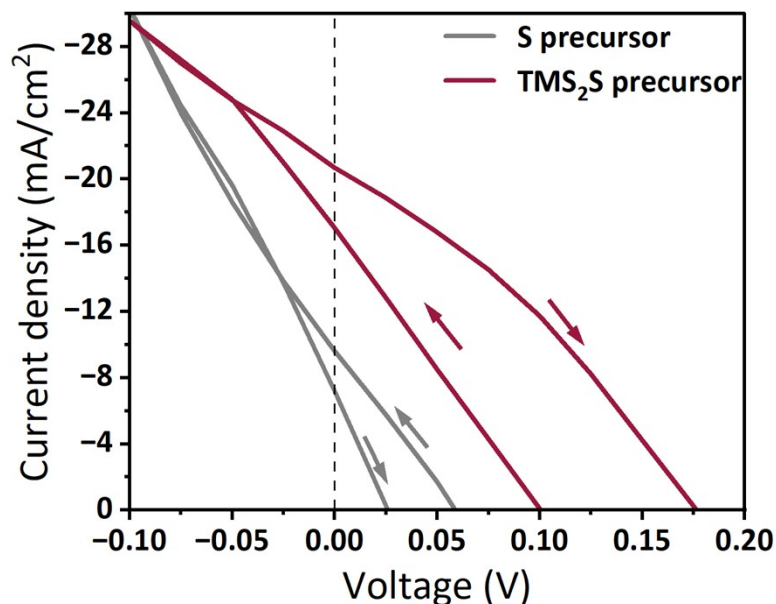

Figure S4.  $J$ - $V$  curves (forward and reverse scanning) of devices based on  $\text{AgBiS}_2$  synthesized with S and  $\text{TMS}_2\text{S}$  precursors.

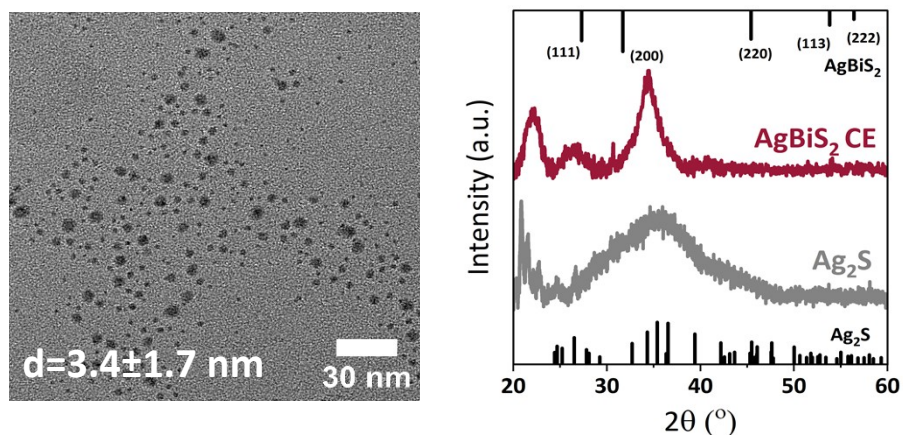

Figure S5: Left: TEM image of larger  $\text{Ag}_2\text{S}$  QDs ( $>3$  nm average size) used for the cation exchange reaction. Right: XRD pattern of the initial larger  $\text{Ag}_2\text{S}$  QDs and the material after 120 min cation exchange at  $50^\circ\text{C}$  with  $\text{Bi}(\text{neo})_3$ . A complete conversion into high-quality  $\text{AgBiS}_2$  cannot be achieved for such QDs.

Table S3. Averaged photovoltaic parameters of Ag<sub>2</sub>S and AgBiS<sub>2</sub> based solar cells.

|                 | $V_{oc}$ (V) | $J_{sc}$ (mA/cm <sup>2</sup> ) | FF (%)    | PCE (%)   |
|-----------------|--------------|--------------------------------|-----------|-----------|
| 0 min           | 0.246±0.060  | 2.65±0.91                      | 0.37±0.06 | 0.27±0.18 |
| Champion device | 0.331        | 3.95                           | 0.45      | 0.58      |
| 30 min          | 0.478±0.008  | 15.28±1.58                     | 0.43±0.08 | 3.31±0.70 |
| Champion device | 0.478        | 16.98                          | 0.52      | 4.27      |
| 120 min         | 0.484±0.004  | 23.07±1.03                     | 0.61±0.02 | 6.76±0.53 |
| Champion device | 0.486        | 23.81                          | 0.64      | 7.35      |

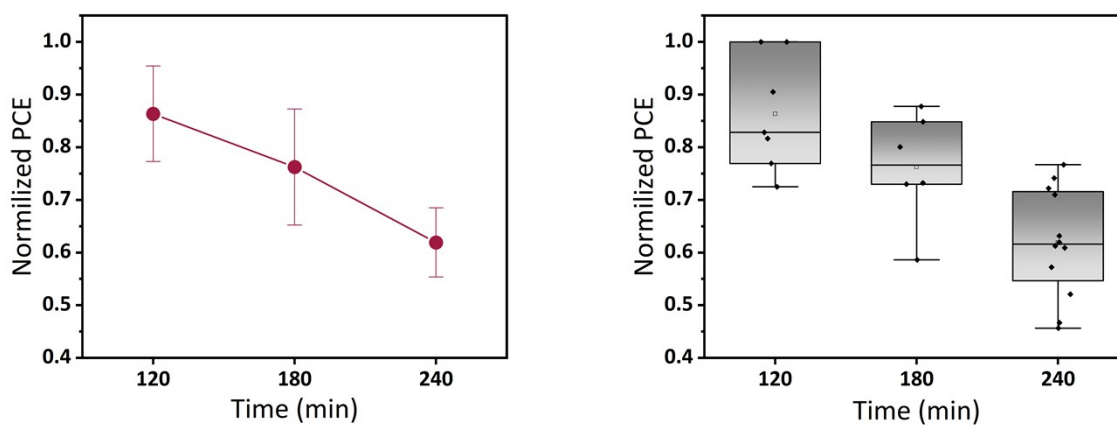

Figure S6: Performance Evaluation of the solar cell efficiency (PCE) for longer cation exchange times (normalized to the best performing solar cell.)

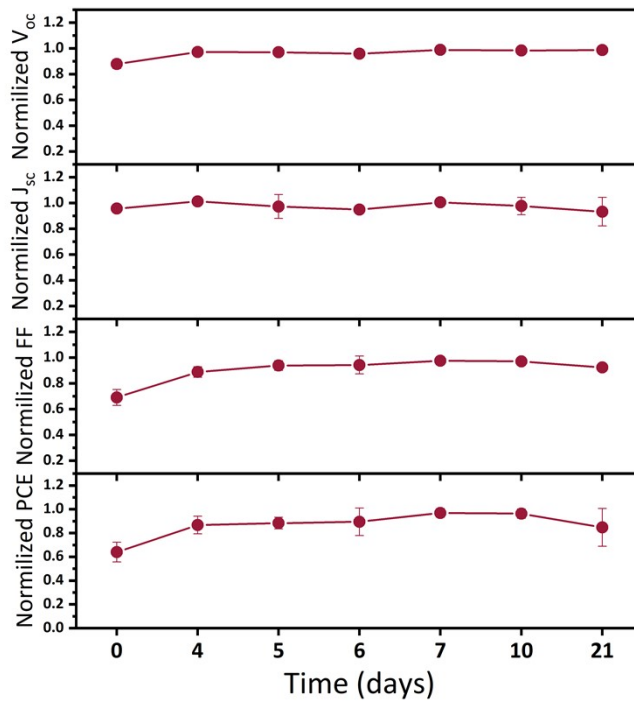

Figure S7: Evolution of the solar cell parameters and performance upon storage in ambient and electrical measurements on day 0 (directly after fabrication), day 4, 5, 6, 7, 10, and 21.

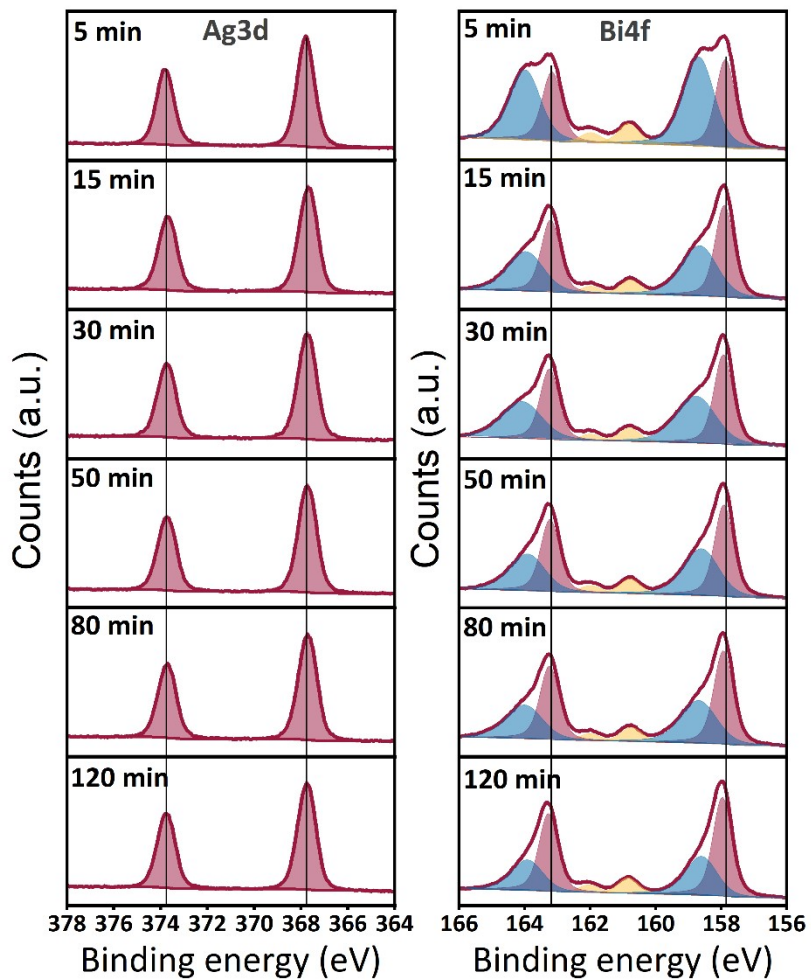

Figure S8. XPS spectra of Ag 3d (left column) and Bi 4f and S 2p (right column) for different times of cation exchange.

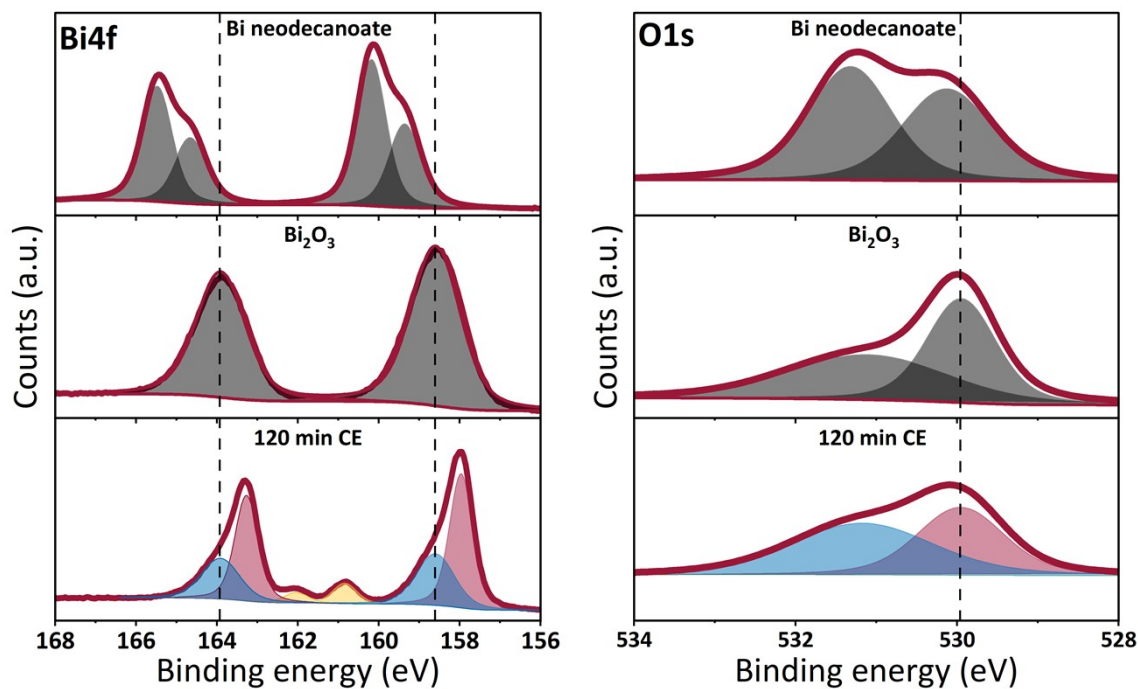

Figure S9: Left panel: XPS data for Bi 4f (left panel) and O 1s (right panel) of Bi(neo)<sub>3</sub> precursor, Bi<sub>2</sub>O<sub>3</sub> and AgBiS<sub>2</sub> nanocrystals after 120min of cation exchange (CE).

## References

1. Albaladejo-Siguan, M. *et al.* Bis(stearoyl) Sulfide: A Stable, Odor-Free Sulfur Precursor for High-Efficiency Metal Sulfide Quantum Dot Photovoltaics. *Advanced Energy Materials* vol. 13 at <https://doi.org/10.1002/aenm.202203965> (2023).
2. Bernechea, M. *et al.* Solution-processed solar cells based on environmentally friendly AgBiS<sub>2</sub> nanocrystals. *Nat. Photonics* **10**, 521–525 (2016).
